# Supplementary material
Source: HighWire-hosted journal article supplement (https://bmjopen.bmj.com/content/8/1/e018021)
Supplement: inline-supplementary-material-1 [file inline-supplementary-material-1.pdf]

**Supplemental table 1. Intake of probiotics before and during pregnancy and risk of spontaneous early and late preterm delivery in singleton pregnancies, n=34,458.**

|                                           | <b>Preterm delivery (full term)</b> | <b>Adjusted Odds ratio (95% confidence interval)<sup>1</sup></b> | <b>p</b> |
|-------------------------------------------|-------------------------------------|------------------------------------------------------------------|----------|
| <b>Early spontaneous preterm delivery</b> | 276 (26,910)                        |                                                                  |          |
| Overall                                   |                                     | -                                                                | 0.75     |
| Before                                    |                                     | 0.81 (0.45,1.48)                                                 | 0.49     |
| Early                                     |                                     | 1.04 (0.61,1.78)                                                 | 0.88     |
| Late                                      |                                     | 0.84 (0.56, 1.26)                                                | 0.41     |
| <b>Late spontaneous preterm delivery</b>  | 1,260 (26,910)                      |                                                                  |          |
| Overall                                   |                                     | -                                                                | 0.02     |
| Before                                    |                                     | 1.36 (1.00,1.85)                                                 | 0.047    |
| Early                                     |                                     | 0.67 (0.50,0.90)                                                 | 0.008    |
| Late                                      |                                     | 0.96 (0.79, 1.17)                                                | 0.71     |

<sup>1</sup>Adjusted for maternal age, height and educational level; parity; history of late miscarriage; history of preterm delivery (for multiparous only); pre-pregnant BMI; marital status; smoking, alcohol, and intake of non-probiotic milk products during current pregnancy; family income; fetal sex; IVF and intake of dietary supplements (with and without vitamin D)
